# Supplementary material
Source: PubMed Central journal article supplement (PMC2410073)

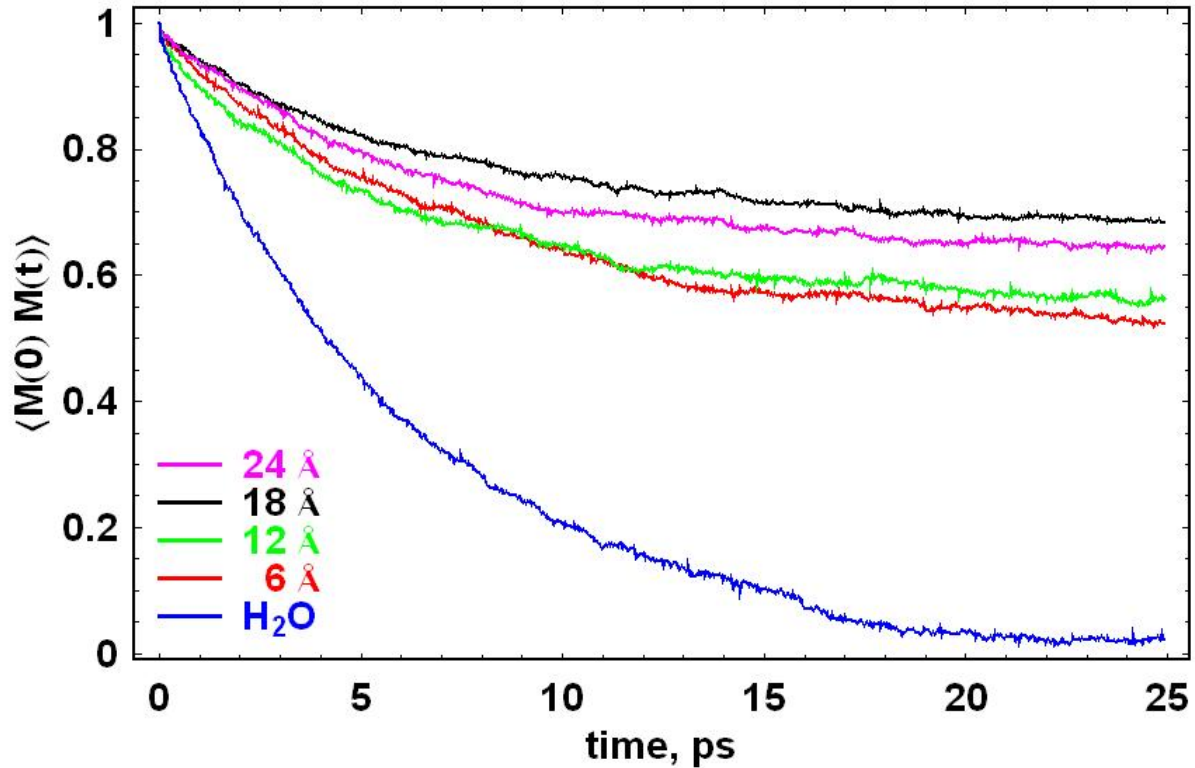

Supplement: pnas_0709207104_1.pdf [file pnas_0709207104_1.pdf]
